# Supplementary material for: B-site substitution in A 2 BO 4 Ruddlesden–Popper perovskites for enhanced OER and HER in alkaline medium
Source: Royal Society of Chemistry journal article supplement (doi:10.1039/d5ce00782h), 2025-11-07
Supplement: d5ce00782h1.pdf [file d5ce00782h1.pdf]

## Supplementary Information

### **B-Site Substitution in $A_2BO_4$ Ruddlesden-Popper Perovskites for Enhanced OER and HER in Alkaline Medium.**

Yuhu Huang<sup>1,2</sup>, Jin Li<sup>1,2</sup>, Yuda Yu<sup>1,2</sup>, Jiaping Hu<sup>1,2</sup>, Han-Shu Xu<sup>3</sup> and Kaibin Tang<sup>1,2\*</sup>

<sup>1</sup> Hefei National Research Center for Physical Sciences at the Microscale, University of Science and Technology of China, Hefei, 230026, China.

<sup>2</sup> Department of Chemistry, University of Science and Technology of China, Hefei, 230026, China.

<sup>3</sup> Department of Applied Physics, School of Biomedical Engineering, Anhui Medical University, Hefei, 230032, China.

## 1.1 Synthesis of the catalysts

The all catalysts were synthesized using a modified Pechini method. Taking the synthesis of  $\text{PrSrCo}_{0.6}\text{Fe}_{0.4}\text{O}_4$  as a representative example: 1 mmol of  $\text{Pr}(\text{NO}_3)_3 \cdot 6\text{H}_2\text{O}$  (AR, SCRC), 1 mmol  $\text{Sr}(\text{NO}_3)_2$  (AR, SCRC), 0.6 mmol  $\text{Co}(\text{NO}_3)_2 \cdot 6\text{H}_2\text{O}$  (AR, SCRC) and 0.4 mmol  $\text{Fe}(\text{NO}_3)_2 \cdot 9\text{H}_2\text{O}$  (AR, SCRC) were dissolved in 50 ml deionized water. Subsequently, 4.5 mmol of citric acid (CA) (analytical reagent, SCRC) and 3 mmol of ethylenediaminetetraacetic acid (EDTA, AR, SCRC) was added as complexing agents to promote uniform dispersion of the metal ions. The pH value was then adjusted to 7-8 by the addition of  $\text{NH}_3 \cdot \text{H}_2\text{O}$  (25%, SCRC). The resulting solution underwent spontaneous combustion upon heating in an evaporating dish, resulting in a black ash. This ash was thoroughly ground using a mortar and subsequently transferred to an  $\text{Al}_2\text{O}_3$  crucible, where it was subjected to calcination in a muffle furnace at  $1150^\circ\text{C}$  for 10 hours to obtain the desired  $\text{PrSrCo}_{0.6}\text{Fe}_{0.4}\text{O}_4$  product. For the synthesis of  $\text{PrSrCo}_{0.6}\text{Fe}_{0.4-z}\text{Ni}_z\text{O}_4$ ,  $\text{Ni}(\text{NO}_3)_2 \cdot 6\text{H}_2\text{O}$  (AR, SCRC) was used to partially replace  $\text{Fe}(\text{NO}_3)_2 \cdot 9\text{H}_2\text{O}$  in appropriate proportions, while keeping the total molar amount of Fe and Ni constant at 0.4 mmol. In the case of noble-metal substitution (Ir or Ru), the  $\text{PrSrCo}_{0.6}\text{Fe}_{0.4-x}\text{M}_x\text{O}_4$  ( $\text{M} = \text{Ir}, \text{Ru}$ ) catalysts were synthesized by substituting a portion of the  $\text{Fe}(\text{NO}_3)_2 \cdot 9\text{H}_2\text{O}$  with pre-dissolved  $\text{IrCl}_4 \cdot n\text{H}_2\text{O}$  or  $\text{RuCl}_3 \cdot n\text{H}_2\text{O}$ . The remaining synthesis steps were consistent with those used for  $\text{PrSrCo}_{0.6}\text{Fe}_{0.4}\text{O}_4$ .

## 1.2 Characterization

The synthesized compounds underwent characterization through X-ray diffraction (XRD) analysis conducted using a Rigaku SmartLab SE diffractometer, utilizing  $\text{Cu K}\alpha$  radiation ( $\lambda = 1.5418 \text{ \AA}$ ) at 40 KV and 40 mA. XRD patterns were collected at room temperature within the  $2\theta$  range of  $10\text{--}80^\circ$ , with an interval of  $0.02^\circ$ . Detailed structural information was then refined using the Rietveld method within the GSAS-II software. Comprehensive evaluations of morphology and composition were conducted utilizing a range of techniques. Scanning electron microscopy (SEM) was performed employing a JEOLJSM-6700F instrument. X-ray photoelectron spectroscopy (XPS) investigations were carried out using an ESCALAB250Xi spectroscope. And the field emission high-resolution transmission electron microscopy (HRTEM) equipped with energy-dispersive X-ray spectroscopy (EDX) was employed, utilizing a Talos F200X instrument. Additionally, specific surface areas were determined utilizing the Brunauer-Emmett-Teller (BET) technique, employing a Micromeritics ASAP 2460 instrument. Furthermore, magnetization characteristics were assessed using a SQUID magnetometer (MPMS3, Quantum Design).

## 1.3 Electrochemical Measurements

The electrochemical performance of the catalyst was assessed using a standard three-electrode system in a 1M KOH electrolyte at room temperature, employing the CHI760E electrochemical workstation. To prepare the working electrode, 5 mg of the catalyst and 1 mg of conductive carbon black were dispersed in 800  $\mu\text{L}$  of ethanol. Subsequently, 40  $\mu\text{L}$  of Nafion was added, and the resulting mixture underwent ultrasonication for approximately 1 hour to achieve a homogeneous ink. A 5  $\mu\text{L}$  aliquot of the ink was then deposited onto a glassy carbon electrode (diameter = 3 mm) and dried at room temperature, resulting in a catalyst loading of  $0.421 \text{ mg cm}^{-2}$ . The Pt wire and 1M

KOH Hg/HgO were employed as the counter electrode and reference electrode, respectively.

The perovskite electrocatalysts underwent activation through 20 cycles of cyclic voltammetry (CV) scans conducted between 0.1-0.9 V vs. Hg/HgO at a scan rate of 100 mV s<sup>-1</sup>. Following activation, polarization curves were generated using linear sweep voltammetry (LSV) at a scan rate of 5 mV s<sup>-1</sup>. These polarization curves were then reanalyzed by plotting overpotential ( $\eta$ ) against the logarithm of current density ( $\log |j|$ ) to derive Tafel plots. The linear segments of the Tafel plots were subsequently fitted to the Tafel equation ( $\eta = b \log |j| + a$ ) to determine the Tafel slope. Furthermore, electrochemical impedance spectroscopy (EIS) was conducted at 1.57 V vs. RHE over a frequency range spanning 100 kHz to 0.1 Hz, applying an AC voltage of 5 mV. The electrochemical double-layer capacitance ( $C_{dl}$ ) was obtained from CV results recorded between 0.1 V and 0.2 V vs. Hg/HgO at scan rates of 20, 40, 60, 80, 100, 120, 140, and 160 mV s<sup>-1</sup>. The calculation of mass activity (MA, A g<sup>-1</sup>) is determined using the following equation:

$$MA = |J|/m \quad (1-1)$$

where, J represents the current density (mA cm<sup>-2</sup>), and m is the mass loading of the catalyst, approximately 0.425 mg cm<sup>-2</sup>.

The turnover frequency (TOF) for all the catalysts has been calculated using the following relation:

$$TOF = |J|/(nFC) \quad (1-2)$$

where, the symbols represent the following parameters:

J: Measured current density value (mA cm<sup>-2</sup>) at a specific overpotential.

C: The density of catalytically active metal sites (mol cm<sup>-2</sup>).

n: Number of electron transfers, where n = 4 for OER and n = 2 for HER.

F: Faraday constant, with a numerical value of 96,485 C mol<sup>-1</sup>.

For HER measurements, the counter electrode was replaced with a graphite rod, and the tests were conducted within a potential range of -0.9 to -1.5 V vs. Hg/HgO. EIS was performed at -0.32 V vs. RHE, while the  $C_{dl}$  was measured in the potential window of -0.7 to -0.8 V vs. Hg/HgO. All other testing procedures were consistent with those used for OER measurements.

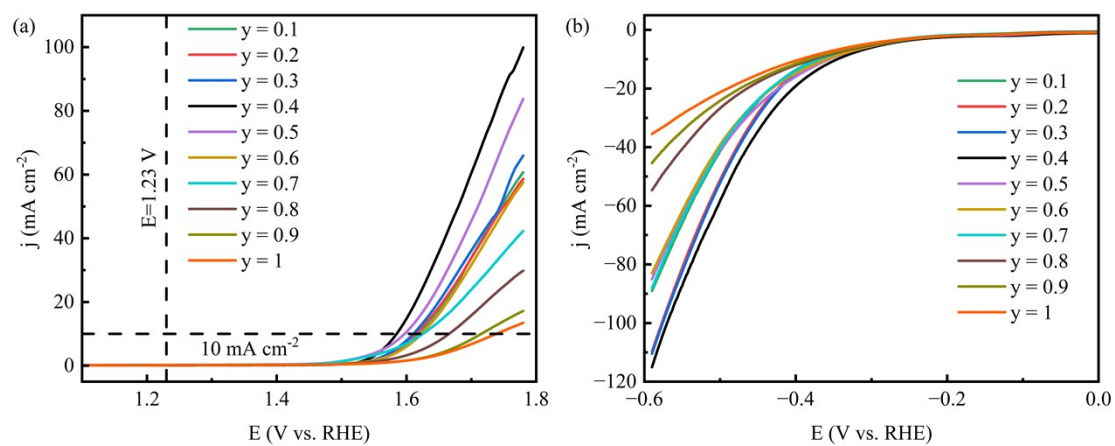

Fig. S1 Electrocatalytic performance of  $\text{PrSrCo}_{1-y}\text{Fe}_y\text{O}_4$ : (a) LSV curves for OER; (b) LSV curves for HER.

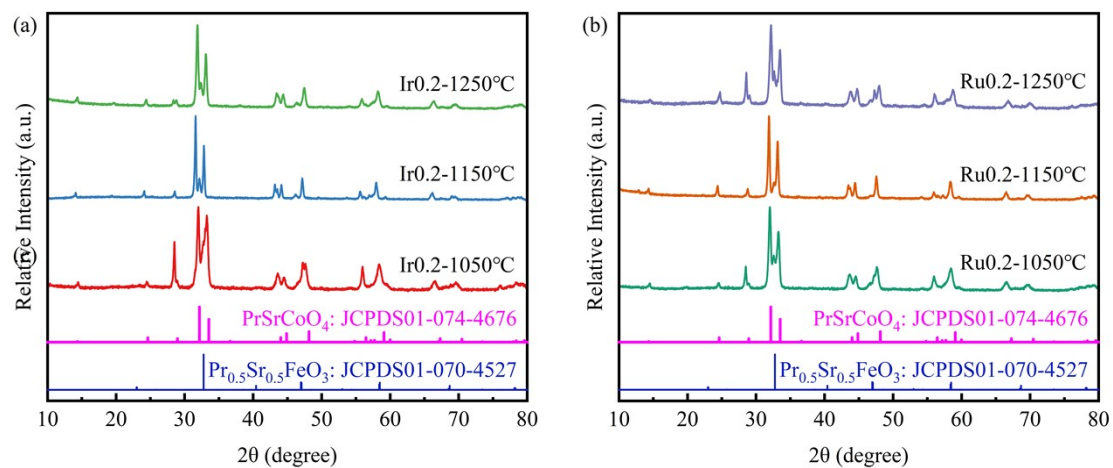

Fig. S2 XRD patterns of (a)  $\text{PrSrCo}_{0.6}\text{Fe}_{0.2}\text{Ir}_{0.2}\text{O}_4$  and (b)  $\text{PrSrCo}_{0.6}\text{Fe}_{0.2}\text{Ru}_{0.2}\text{O}_4$  at different calcination temperatures.

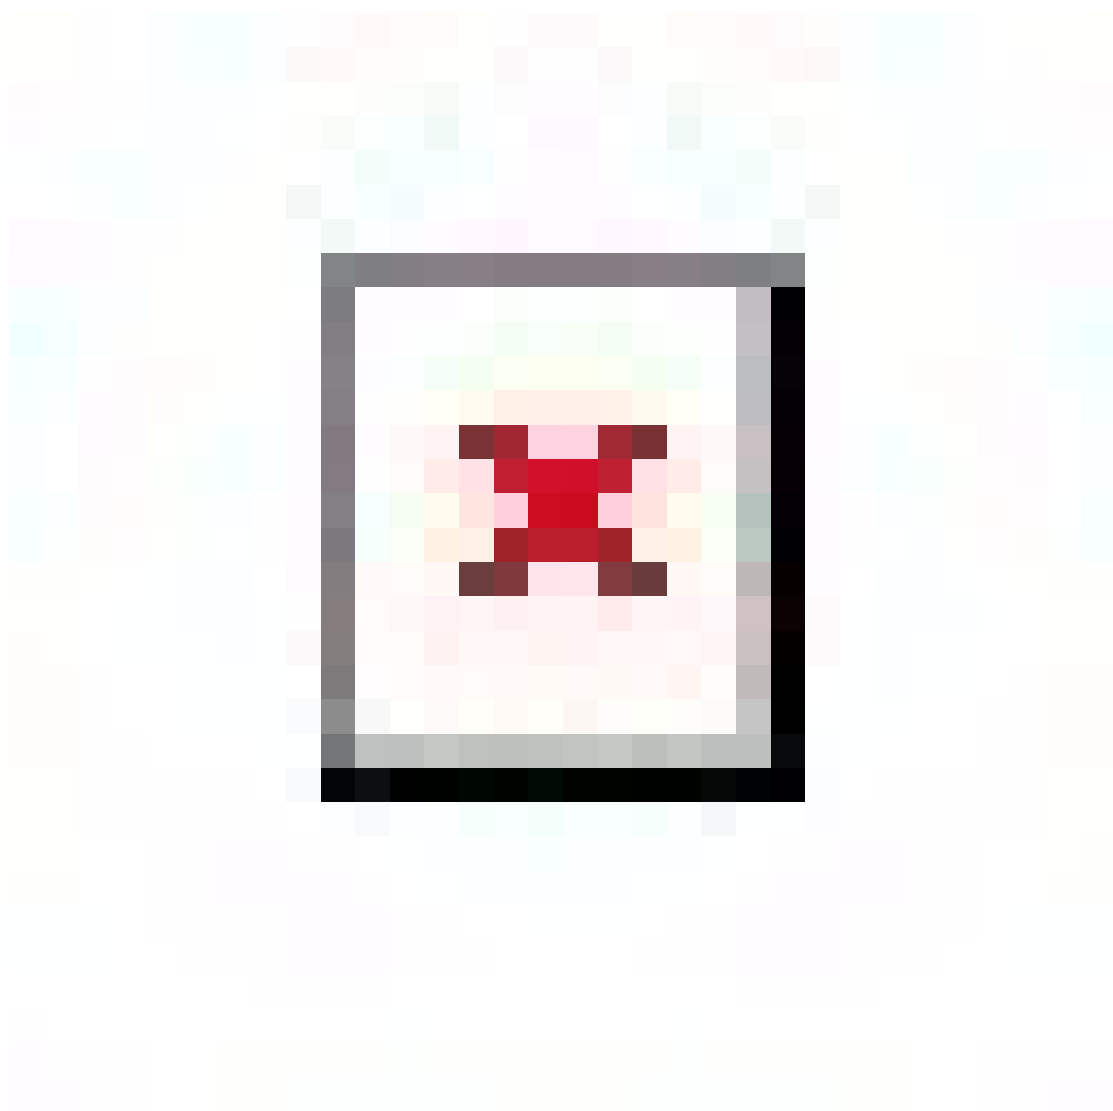

Fig. S3 (a-c) XRD patterns of Ir0.1 catalysts at different calcination temperatures, (d) XRD patterns of Ir0.1 catalysts with different calcination times, and corresponding (e) OER and (f) HER. The LSV data for Ir0.1 (1150°C-10h) used here are reproduced from Fig. 4a and Fig. 5a.

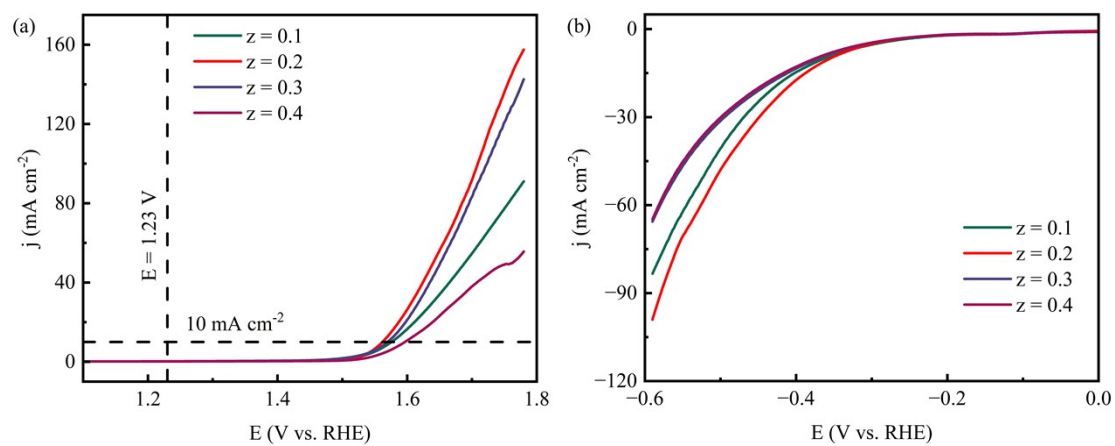

Fig. S4. Electrocatalytic performance of  $\text{PrSrCo}_{0.6}\text{Fe}_{0.4-z}\text{Ni}_z\text{O}_4$ : (a) LSV curves for OER; (b) LSV curves for HER.

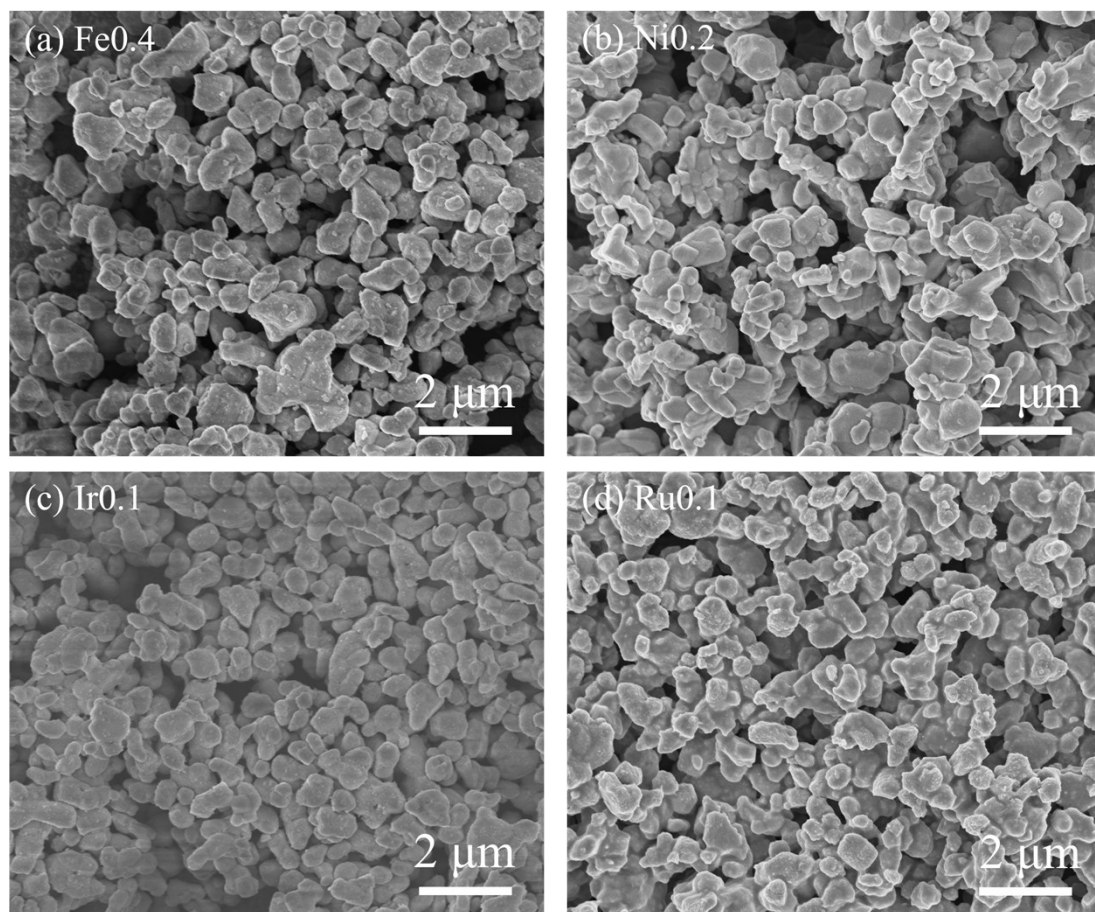

Fig. S5 SEM images of (a) Fe<sub>0.4</sub>, (b) Ni<sub>0.2</sub>, (c) Ir<sub>0.1</sub> and (d) Ru<sub>0.1</sub>.



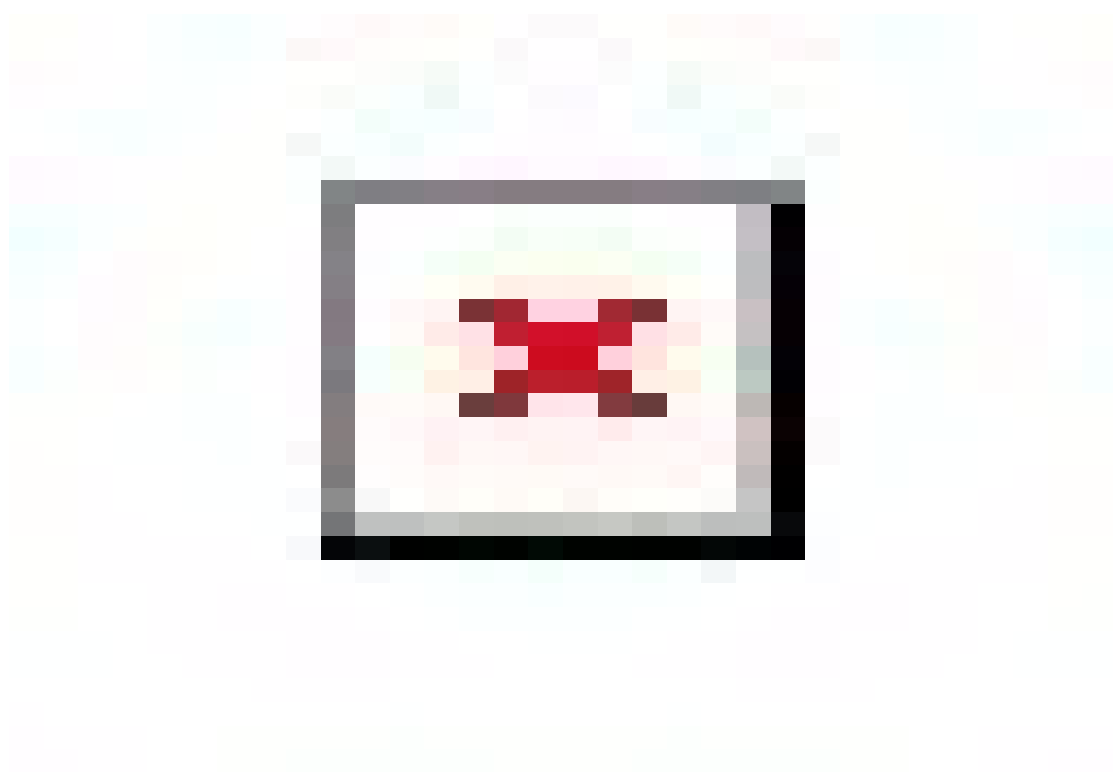

Fig. S6 The  $N_2$  adsorption-desorption isotherms (a) and the corresponding BJH pore size distribution plots (b) in Fe0.4, Ni0.2, Ir0.1 and Ru0.1.

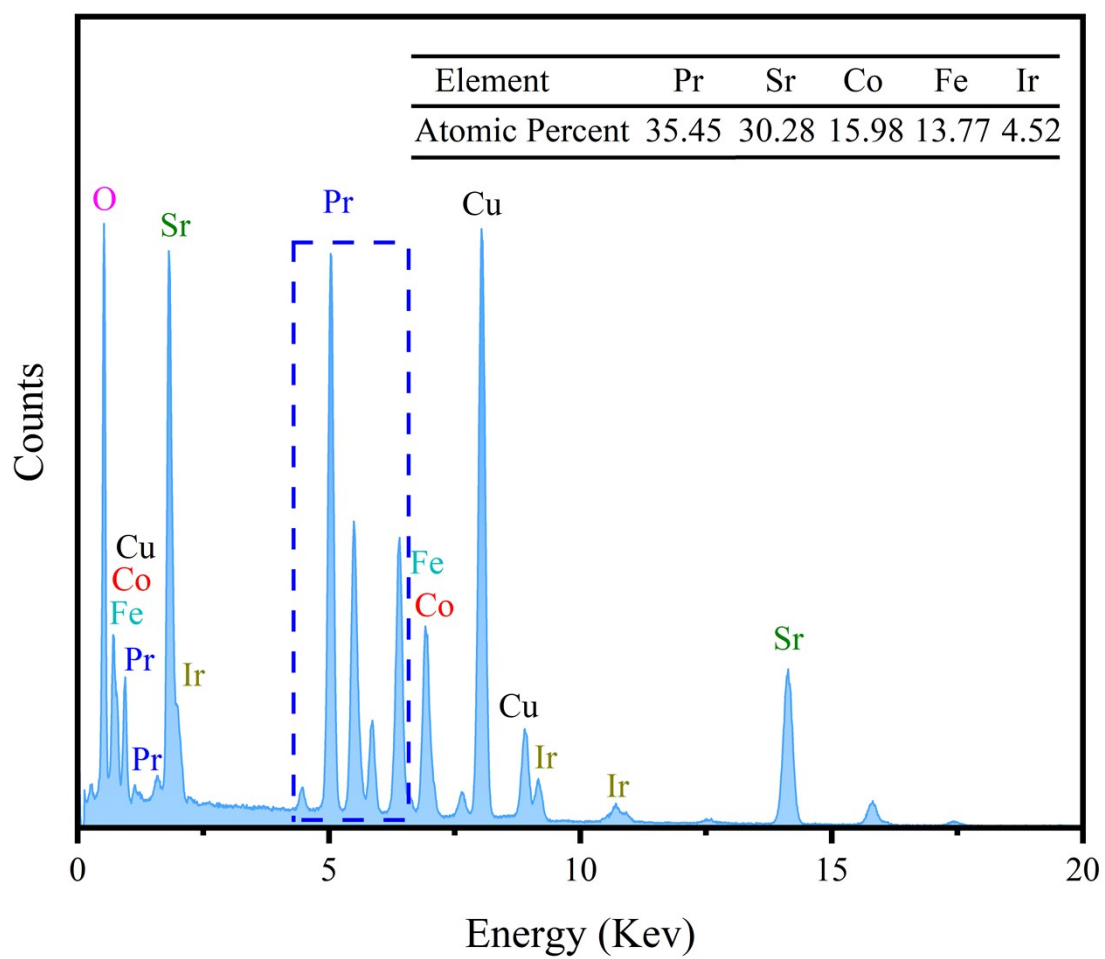

Fig. S7 EDX spectrum of Ir0.1.

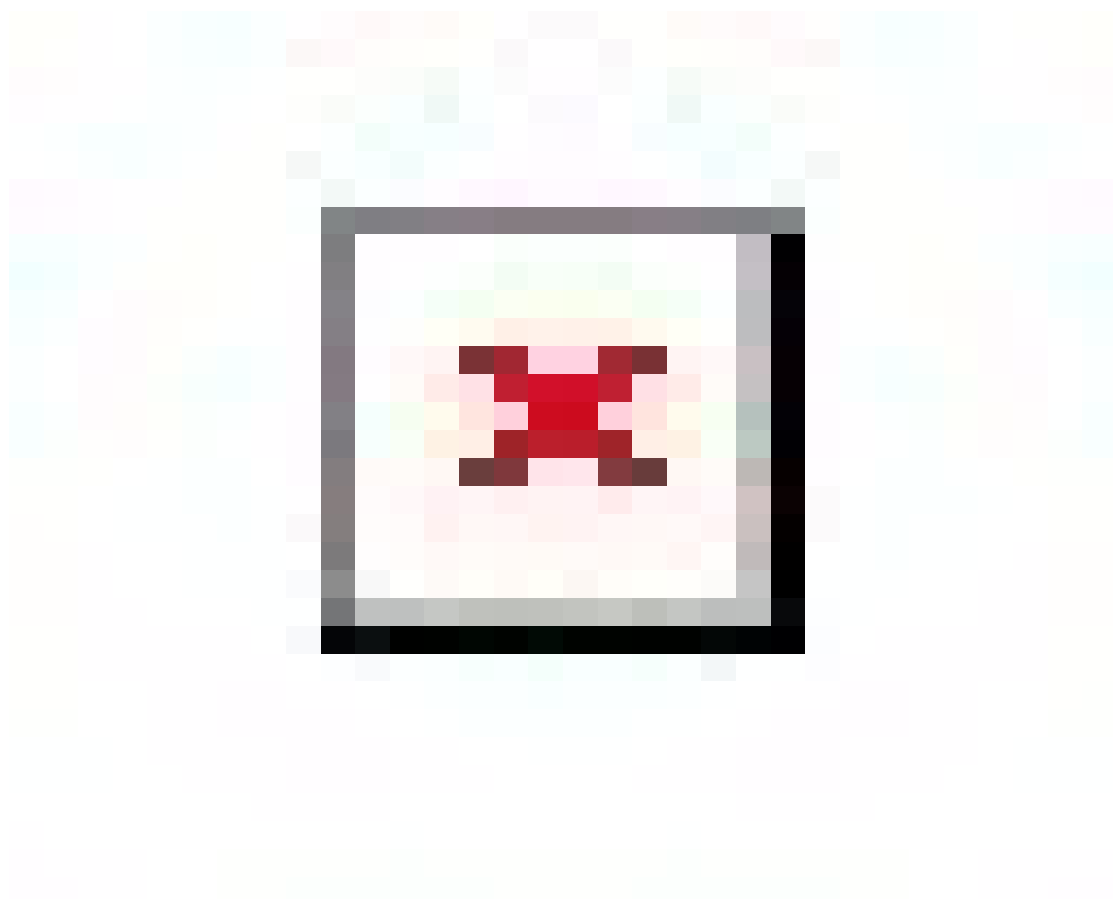

Fig. S8 CV curves of Fe<sub>0.4</sub>, Ni<sub>0.2</sub>, Ir<sub>0.1</sub> and Ru<sub>0.1</sub> under OER test at scan rates of 20, 40, 60, 80, 100, 120, 140, 160 mV s<sup>-1</sup> under 0.1–0.2 V vs. Hg/HgO.

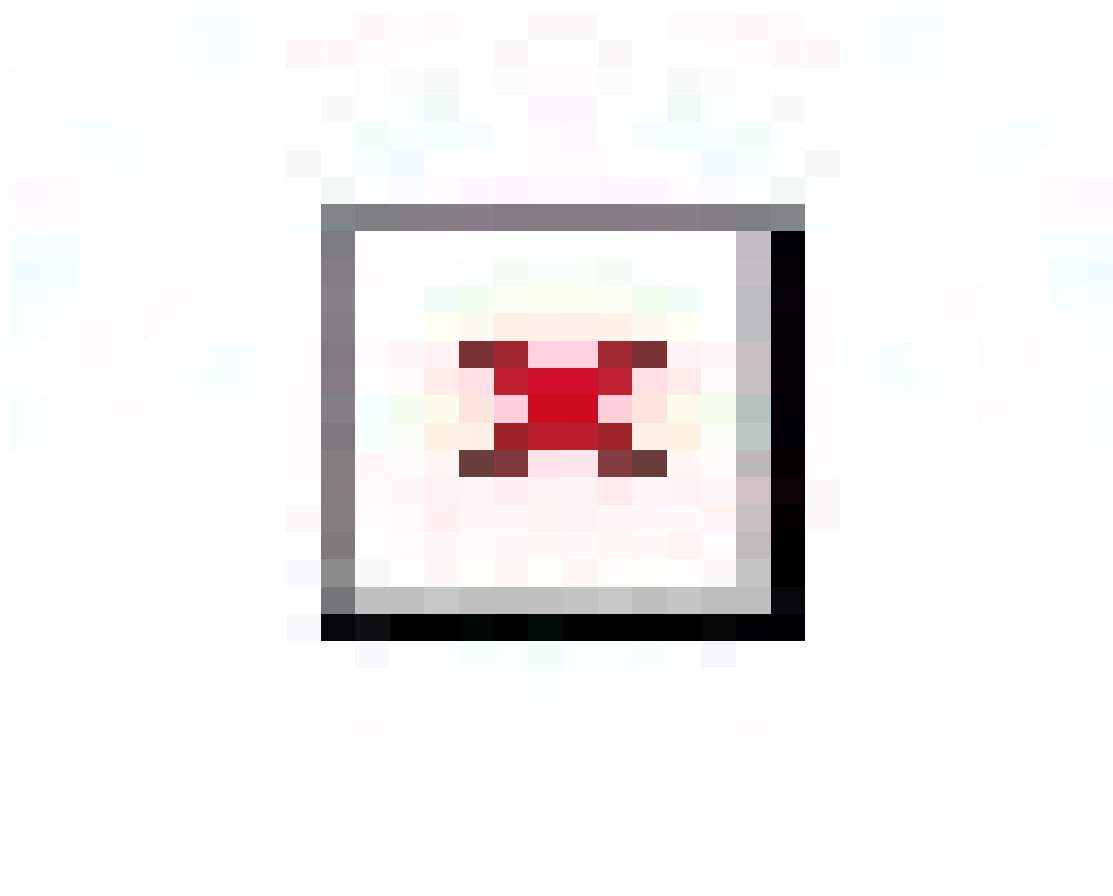

Fig. S9 (a) MA, (b) TOF, (c) Chronopotentiometry test of Fe<sub>0.4</sub>, Ni<sub>0.2</sub>, Ir<sub>0.1</sub> and Ru<sub>0.1</sub> under OER test at 10 mA cm<sup>-2</sup>.

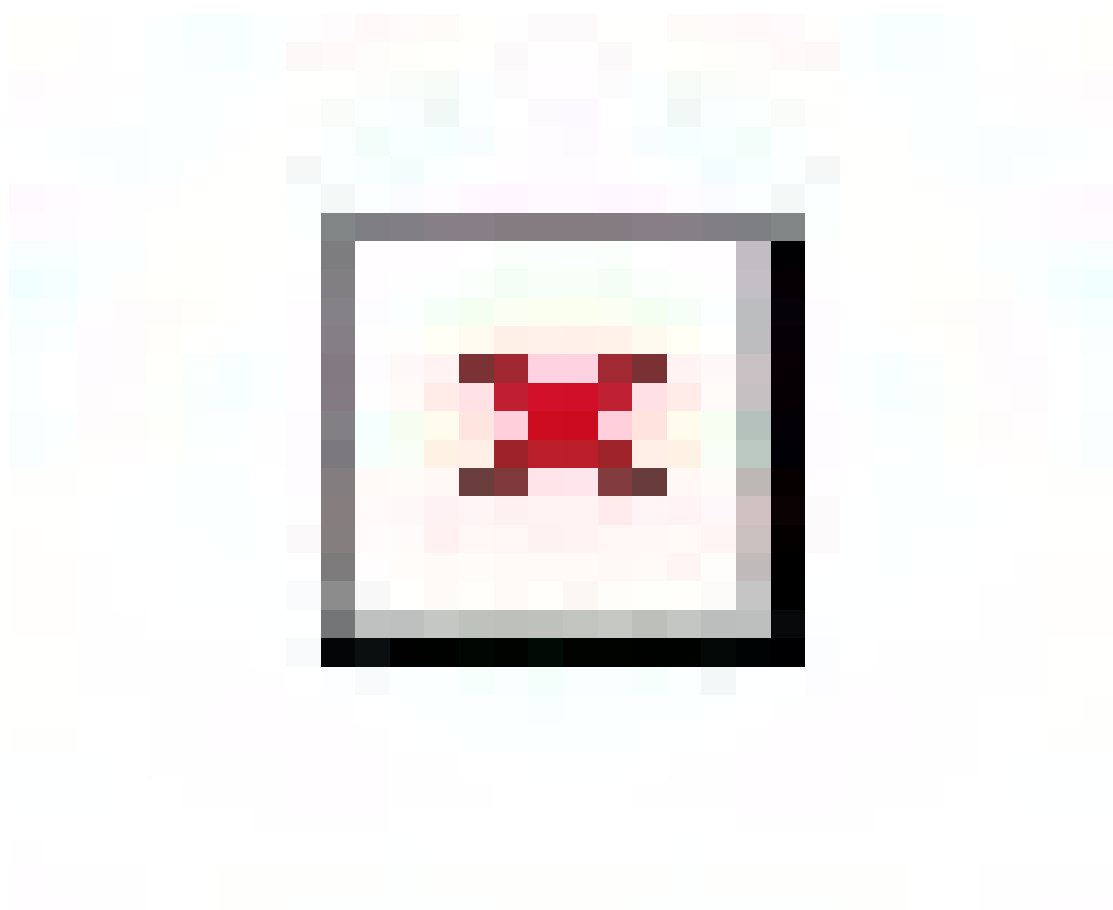

Fig. S10 CV curves of Fe<sub>0.4</sub>, Ni<sub>0.2</sub>, Ir<sub>0.1</sub> and Ru<sub>0.1</sub> under HER test at scan rates of 20, 40, 60, 80, 100, 120, 140, 160 mV s<sup>-1</sup> under -0.7–-0.8 V vs. Hg/HgO.

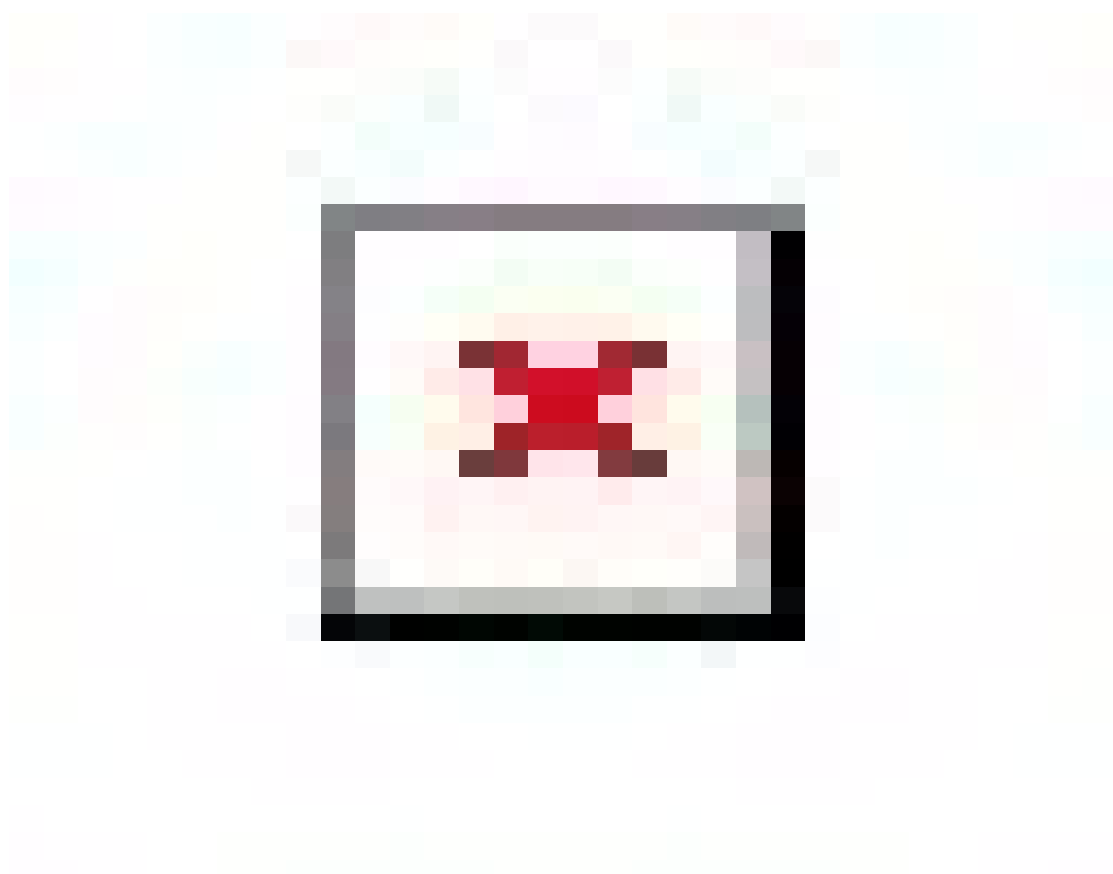

Fig. S11 (a) MA, (b) TOF, (c) Chronopotentiometry test of Fe<sub>0.4</sub>, Ni<sub>0.2</sub>, Ir<sub>0.1</sub> and Ru<sub>0.1</sub> under HER test at 10 mA cm<sup>-2</sup>.

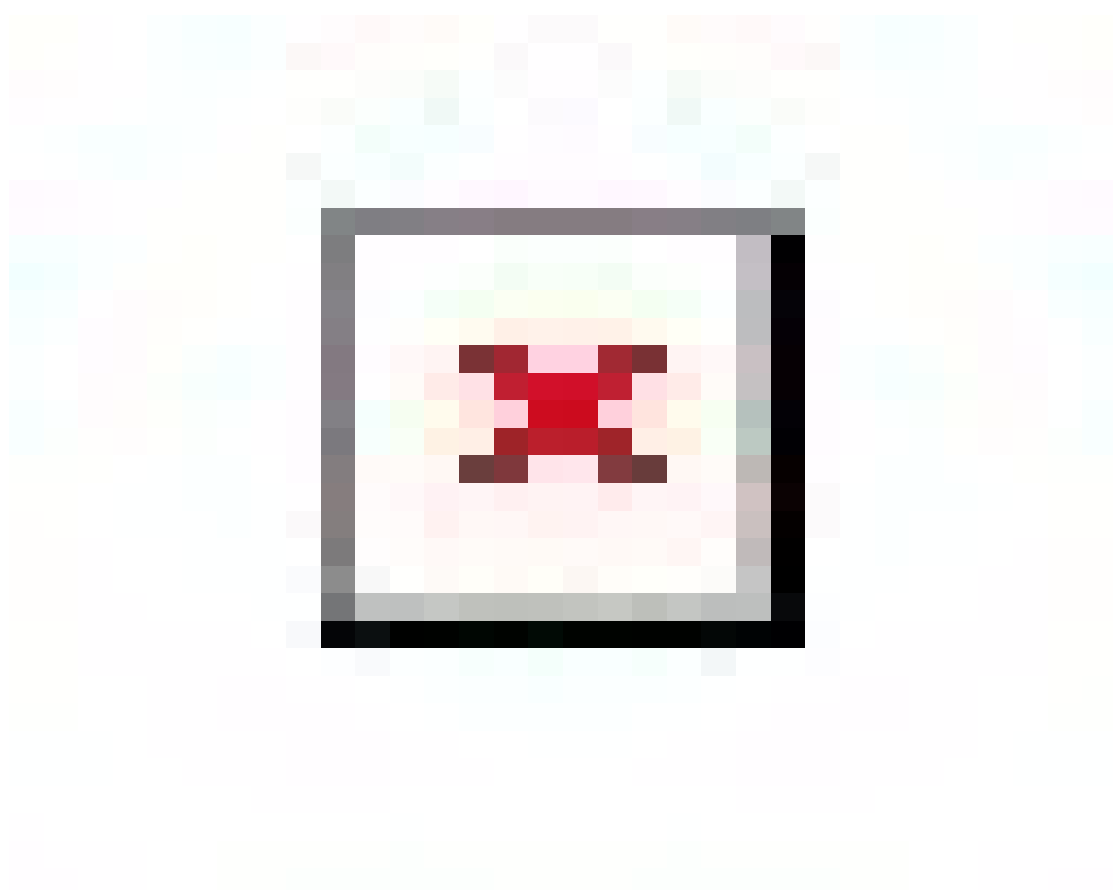

Fig. S12 (a), (c) OER and HER polarization curves normalized by geometric area; (b), (d) The corresponding curves normalized by ECSA. The LSV data for Fe<sub>0.4</sub>, Ni<sub>0.2</sub>, Ir<sub>0.1</sub> and Ru<sub>0.1</sub> used here are reproduced from Fig. 4a and Fig. 5a.

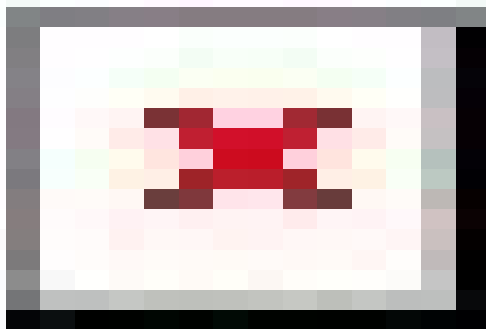

Fig. S13 XPS spectra of (a) Full spectral, (b) Fe 2p, (c) Ni 2p in Ni<sub>0.2</sub>, (d) Ir 4f in Ir<sub>0.1</sub>, and (e) Ru 3p in Ru<sub>0.1</sub>.



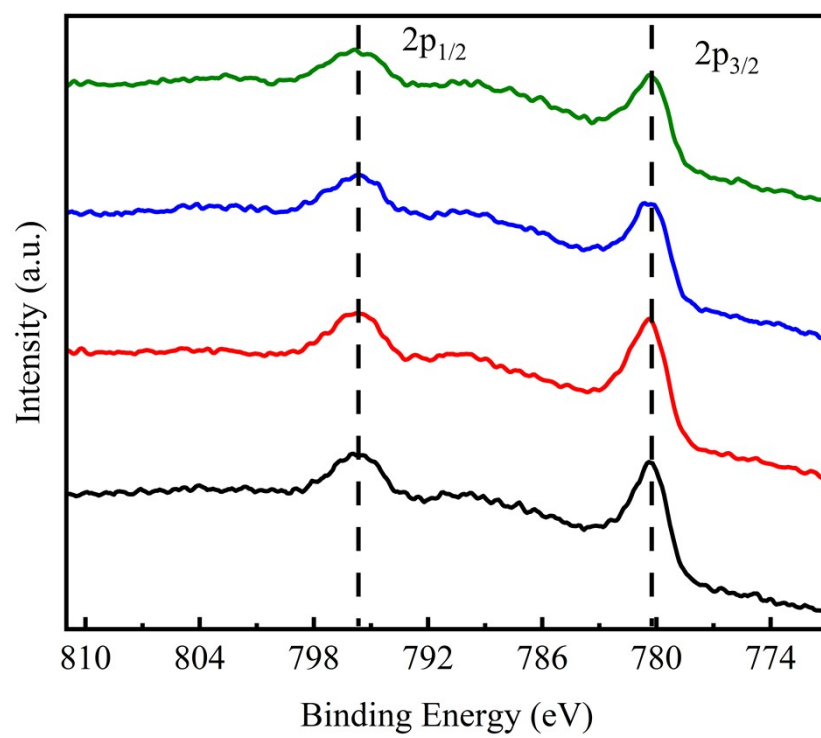

Fig. S14 XPS spectra of Co 2p.

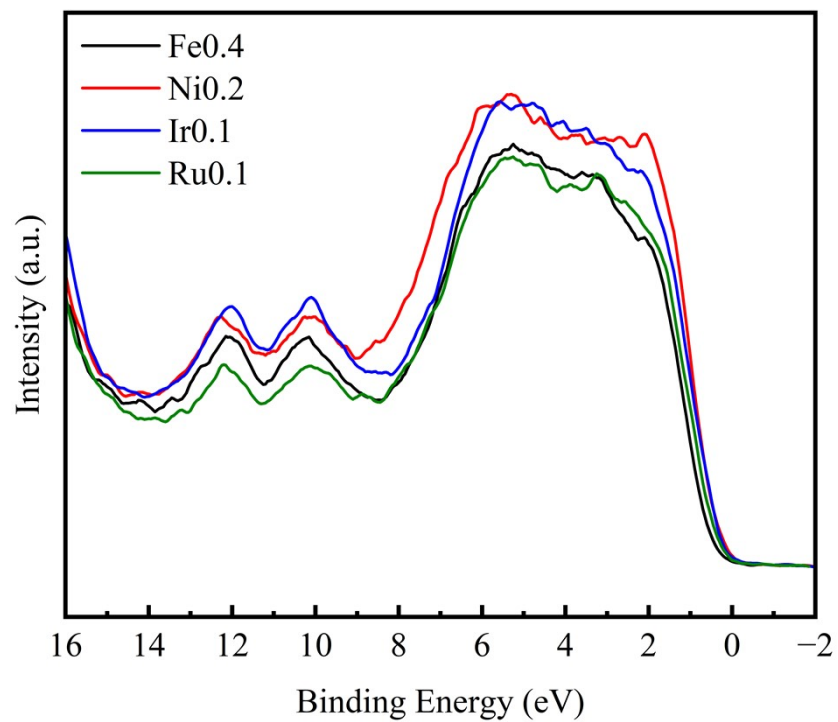

Fig. S15 valance-band spectra of Fe<sub>0.4</sub>, Ni<sub>0.2</sub>, Ir<sub>0.1</sub> and Ru<sub>0.1</sub>.

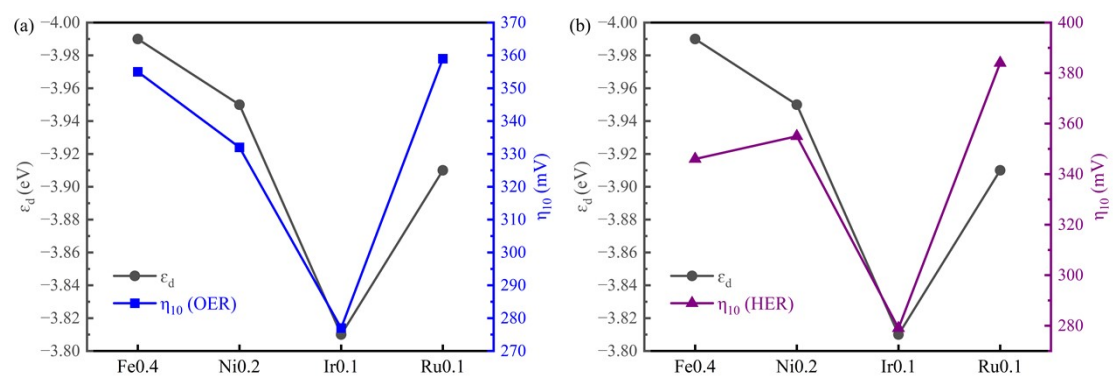

Fig. S16 Relationship between  $\epsilon_d$  and electrocatalytic activity: (a) OER; (b) HER.

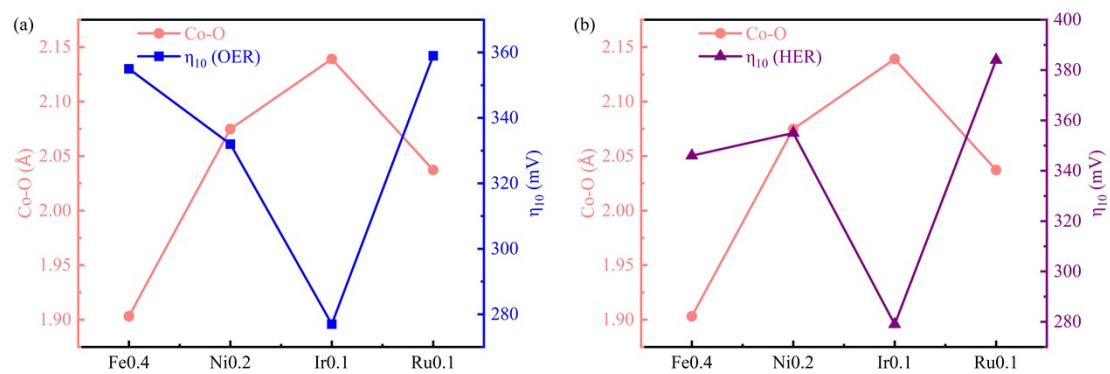

Fig. S17 Relationship between Co-O bond length and electrocatalytic activity: (a) OER; (b) HER.

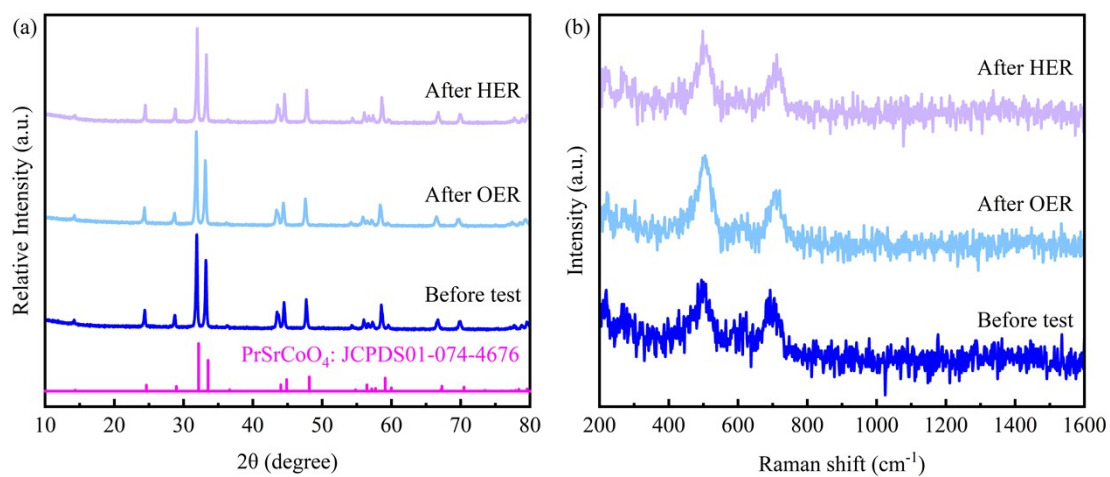

Fig. S18 (a) XRD and (b) Raman results of Ir0.1 before the electrochemical reaction and after long-term stability tests.

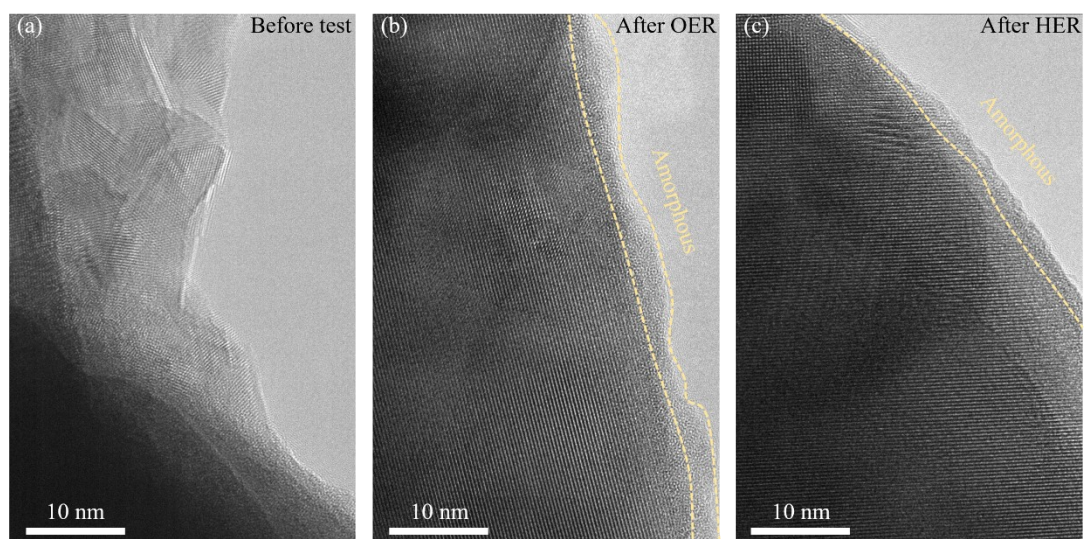

Fig. S19 HRTEM images of the Ir<sub>0.1</sub> catalyst: (a) pristine sample before electrocatalysis, and after long-term stability tests for (b) OER and (c) HER.

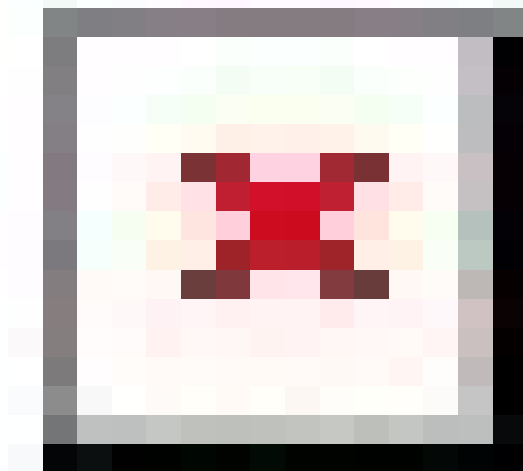

Fig. S20 XPS results of Ir0.1 before the electrochemical reaction and after long-term stability tests.  
(a) Co 2p, (b) Fe 2p, (c) Ir 4f and (d) O 1s.

Table S1. Lattice parameters and reliability factors from Rietveld refinements.

|                             | Fe0.4         | Ni0.2         | Ir0.1                          | Ru0.1         |
|-----------------------------|---------------|---------------|--------------------------------|---------------|
| Space group                 | <i>I4/mmm</i> | <i>I4/mmm</i> | <i>I4/mmm</i>                  | <i>I4/mmm</i> |
| a/b/Å                       | 3.80468       | 3.79543       | 3.81633                        | 3.80197       |
| c/Å                         | 12.41263      | 12.41820      | 12.40114                       | 12.39066      |
| V/Å <sup>3</sup>            | 179.680       | 178.887       | 180.615                        | 179.107       |
| $\alpha/\beta/\gamma$ (deg) |               |               | $\alpha=\beta=\gamma=90^\circ$ |               |
| R <sub>p</sub> (%)          | 3.17          | 3.42          | 3.32                           | 3.66          |
| R <sub>wp</sub> (%)         | 4.76          | 5.07          | 4.72                           | 4.97          |
| $\chi^2$ (%)                | 3.87          | 4.40          | 3.65                           | 2.63          |



Table S2. Summary of recently reported perovskite oxide electrocatalysts for OER.  $\eta_{10}$  represent the overpotential at 10 mA cm<sup>-2</sup>.

| Catalyst                                                                                               | Electrolyte             | $\eta_{10}$ (mV) | Reference       |
|--------------------------------------------------------------------------------------------------------|-------------------------|------------------|-----------------|
| Sr <sub>2</sub> IrO <sub>4</sub> modified SrIrO <sub>3</sub>                                           | 0.1 M HClO <sub>4</sub> | 245              | 1               |
| Ir <sub>0.1</sub>                                                                                      | 1 M KOH                 | 277              | <b>Our work</b> |
| SrIrO <sub>3</sub>                                                                                     | 1 M KOH                 | 290              |                 |
| PrSr <sub>3</sub> Co <sub>1.5</sub> Fe <sub>1.5</sub> O <sub>10-δ</sub>                                | 0.1 M KOH               | 294              | 3               |
| SrCo <sub>0.4</sub> Fe <sub>0.2</sub> W <sub>0.4</sub> O <sub>3-δ</sub>                                | 1 M KOH                 | 300              | 4               |
| LaFe <sub>x</sub> Ni <sub>1-x</sub> O <sub>3</sub>                                                     | 1 M KOH                 | 302              | 5               |
| NdFe <sub>1-x</sub> Ni <sub>x</sub> O <sub>3</sub>                                                     | 1 M KOH                 | 310              | 6               |
| La <sub>1-x</sub> Pr <sub>x</sub> CoO <sub>3</sub>                                                     | 1 M KOH                 | 312              | 7               |
| Ni <sub>0.2</sub>                                                                                      | 1 M KOH                 | 332              | <b>Our work</b> |
| Sr <sub>3</sub> (Co <sub>0.8</sub> Fe <sub>0.1</sub> Nb <sub>0.1</sub> ) <sub>2</sub> O <sub>7-δ</sub> | 0.1 M KOH               | 334              |                 |
| LaSr <sub>3</sub> Co <sub>1.5</sub> Fe <sub>1.5</sub> O <sub>10-δ</sub>                                | 0.1 M KOH               | 341              | 3               |
| Fe <sub>0.4</sub>                                                                                      | 1 M KOH                 | 355              | <b>Our work</b> |
| Ru <sub>0.1</sub>                                                                                      | 1 M KOH                 | 359              |                 |
| PrBaCo <sub>2</sub> O <sub>5.75</sub>                                                                  | 1 M KOH                 | 360              | 9               |
| PrSrCoO <sub>4</sub>                                                                                   | 1 M KOH                 | 375              | 10              |
| NdSr <sub>3</sub> Co <sub>1.5</sub> Fe <sub>1.5</sub> O <sub>10-δ</sub>                                | 0.1 M KOH               | 375              | 3               |
| La <sub>0.9</sub> CoO <sub>3-δ</sub>                                                                   | 0.1 M KOH               | 380              | 11              |
| La <sub>0.7</sub> Sr <sub>0.3</sub> CoO <sub>3-δ</sub>                                                 | 0.1 M KOH               | 390              | 12              |
| PrBaCo <sub>2</sub> O <sub>5.5</sub>                                                                   | 1 M KOH                 | 420              | 9               |
| Sr <sub>0.95</sub> Co <sub>0.8</sub> Nb <sub>0.1</sub> Ni <sub>0.1</sub> O <sub>3-δ</sub>              | 1 M KOH                 | 438              | 13              |
| Pr <sub>0.5</sub> Ba <sub>0.5</sub> CoO <sub>3-δ</sub>                                                 | 0.1 M KOH               | 440              | 14              |
| LaCoO <sub>3</sub>                                                                                     | 1 M KOH                 | 470              | 15              |

Table S3. Summary of recently reported perovskite oxide electrocatalysts for HER.  $\eta_{10}$  represent the overpotential at 10 mA cm<sup>-2</sup>.

| Catalyst                                                                                                     | Electrolyte | $\eta_{10}$ (mV) | Reference       |
|--------------------------------------------------------------------------------------------------------------|-------------|------------------|-----------------|
| (Gd <sub>0.5</sub> La <sub>0.5</sub> )BaCo <sub>2</sub> O <sub>5.5+<math>\delta</math></sub>                 | 1 M KOH     | 210              | 16              |
| PrBaCo <sub>2</sub> O <sub>5.8</sub>                                                                         | 1 M KOH     | 240              | 17              |
| PrBaCo <sub>2</sub> O <sub>5+<math>\delta</math></sub> -1100                                                 | 0.1 M KOH   | 245              | 18              |
| SrNb <sub>0.1</sub> Co <sub>0.7</sub> Fe <sub>0.2</sub> O <sub>3-<math>\delta</math></sub>                   | 0.1 M KOH   | 262              | 19              |
| Ir0.1                                                                                                        | 1 M KOH     | 279              | <b>Our work</b> |
| NdBaMn <sub>2</sub> O <sub>5.5</sub>                                                                         | 1 M KOH     | 290              | 20              |
| Sr <sub>0.95</sub> Nb <sub>0.1</sub> Co <sub>0.7</sub> Ni <sub>0.2</sub> O <sub>3-<math>\delta</math></sub>  | 1 M KOH     | 299              | 21              |
| La <sub>0.96</sub> Ce <sub>0.04</sub> CoO <sub>3-<math>\delta</math></sub>                                   | 1 M KOH     | 305              | 22              |
| SrCo <sub>0.7</sub> Fe <sub>0.25</sub> Mo <sub>0.05</sub> O <sub>3-<math>\delta</math></sub>                 | 1 M KOH     | 323              | 23              |
| Ba <sub>0.5</sub> Sr <sub>0.5</sub> Co <sub>0.8</sub> Fe <sub>0.2</sub> O <sub>3-<math>\delta</math></sub>   | 1 M KOH     | 342              | 24              |
| Fe0.4                                                                                                        | 1 M KOH     | 346              | <b>Our work</b> |
| Ni0.2                                                                                                        | 1 M KOH     | 355              | <b>Our work</b> |
| PrSrCoO <sub>4</sub>                                                                                         | 1 M KOH     | 361              | 10              |
| Ru0.1                                                                                                        | 1 M KOH     | 384              | <b>Our work</b> |
| LaFe <sub>0.8</sub> Co <sub>0.2</sub> O <sub>3-<math>\delta</math></sub>                                     | 1 M KOH     | 400              | 25              |
| La <sub>0.5</sub> Sr <sub>0.5</sub> CoO <sub>3-<math>\delta</math></sub>                                     | 1 M KOH     | 420              | 26              |
| La <sub>0.8</sub> Sr <sub>0.2</sub> Cr <sub>0.69</sub> Ni <sub>0.31</sub> O <sub>3-<math>\delta</math></sub> | 0.1 M KOH   | 447              | 27              |

Table S4. The peak area of  $\text{Co}^{3+}$  and  $\text{Co}^{2+}$  in Co2p XPS

| Electrocatalysts | $\text{Co}^{3+}2\text{p}_{3/2}$<br>(Area) | $\text{Co}^{3+}2\text{p}_{1/2}$<br>(Area) | $\text{Co}^{2+}2\text{p}_{3/2}$<br>(Area) | $\text{Co}^{2+}2\text{p}_{1/2}$<br>(Area) |
|------------------|-------------------------------------------|-------------------------------------------|-------------------------------------------|-------------------------------------------|
| Fe0.4            | 18348.86                                  | 9174.43                                   | 6816.84                                   | 3408.42                                   |
| Ni0.2            | 22709.58                                  | 11354.79                                  | 8580.06                                   | 4290.03                                   |
| Ir0.1            | 17244.52                                  | 8622.26                                   | 6401.12                                   | 3200.56                                   |
| Ru0.1            | 16958.42                                  | 8479.21                                   | 6173.32                                   | 3086.66                                   |

Table S5. The relative concentration of different oxygen species in O1s XPS

| Electrocatalysts | lattice O <sup>2-</sup> (%) | O <sub>2</sub> <sup>2-</sup> /O <sup>-</sup> (%) | OH <sup>-</sup> or O <sub>2</sub> (%) | H <sub>2</sub> O (%) |
|------------------|-----------------------------|--------------------------------------------------|---------------------------------------|----------------------|
| Fe0.4            | 16.81%                      | 15.12%                                           | 60.50%                                | 7.57%                |
| Ni0.2            | 16.61%                      | 18.05%                                           | 60.65%                                | 4.69%                |
| Ir0.1            | 15.76%                      | 20.60%                                           | 58.27%                                | 5.37%                |
| Ru0.1            | 18.14%                      | 14.73%                                           | 61.57%                                | 5.56%                |

Table S6. Weiss temperature ( $\theta$ ) and effective magnetic moment ( $\mu_{\text{eff}}$ )

|                                              | Fe0.4   | Ni0.2  | Ir0.1   | Ru0.1  |
|----------------------------------------------|---------|--------|---------|--------|
| $\theta/\text{K}$                            | -103.64 | -88.75 | -109.04 | -85.46 |
| $\mu_{\text{eff}}/\mu_{\text{B}}$            | 5.03    | 4.98   | 5.20    | 5.17   |
| $\mu_{\text{eff}}(\text{Co})/\mu_{\text{B}}$ | 3.15    | 3.66   | 3.93    | 3.78   |

## References

- [1] Zhang, L.; Jang, H.; Li, Z.; Liu, H.; Kim, M. G.; Liu, X.; Cho, J. SrIrO<sub>3</sub> modified with laminar Sr<sub>2</sub>IrO<sub>4</sub> as a robust bifunctional electrocatalyst for overall water splitting in acidic media. *Chem. Eng. J.* **2021**, *419*, 129604.
- [2] Shin, S.; Kwon, T.; Kim, K.; Kim, M.; Kim, M. H.; Lee, Y. Single-Phase Perovskite SrIrO<sub>3</sub> Nanofibers as a Highly Efficient Electrocatalyst for a pH-Universal Oxygen Evolution Reaction. *ACS Appl. Energy Mater.* **2022**, *5* (5), 6146-6154.
- [3] W. Zhu, J. Chen, D. Liu, G. Yang, W. Zhou, R. Ran, J. Yu, Z. Shao. Engineering the oxygen-evolution activity by changing the A-site rare-earth element in RSr<sub>3</sub>Fe<sub>1.5</sub>Co<sub>1.5</sub>O<sub>10- $\delta$</sub>  (R=La, Nd, Pr) Ruddlesden-Popper perovskites. *Mater. Chem. Front.* **2023**, *7*, 4526-4534.
- [4] G. Chen, Z. Hu, Y. Zhu, Z.-G. Chen, Y. Zhong, H.-J. Lin, C.-T. Chen, L. H. Tjeng, W. Zhou, Z. Shao. Ultrahigh-performance tungsten-doped perovskites for the oxygen evolution reaction. *J. Mater. Chem. A* **2018**, *6*, 9854-9859.
- [5] Wang, H.; Wang, J.; Pi, Y.; Shao, Q.; Tan, Y.; Huang, X. Double Perovskite LaFe<sub>x</sub>Ni<sub>1-x</sub>O<sub>3</sub> Nanorods Enable Efficient Oxygen Evolution Electrocatalysis. *Angew. Chem. Int. Ed.* **2019**, *58* (8), 2316-2320.
- [6] Khreif, Y.; Omari, M.; Makhoulfi, S. Synthesis and catalytic properties of Ni-doped NdFeO<sub>3</sub>. *Inorg. Chim. Acta* **2024**, *566*.
- [7] Xie, R.; Nie, Z.; Hu, X.; Yu, Y.; Aruta, C.; Yang, N. Pr-Doped LaCoO<sub>3</sub> toward Stable and Efficient Oxygen Evolution Reaction. *ACS Appl. Energy Mater.* **2021**, *4* (9), 9057-9065.
- [8] Y. Zhu, H. A. Tahini, Z. Hu, Y. Yin, Q. Lin, H. Sun, Y. Zhong, Y. Chen, F. Zhang, H.-J. Lin, C.-T. Chen, W. Zhou, X. Zhang, S. C. Smith, Z. Shao, H. Wang. Boosting oxygen evolution reaction by activation of lattice-oxygen sites in layered Ruddlesden-Popper oxide. *EcoMat.* **2020**; *2*: e12021.
- [9] X. Miao, L. Wu, Y. Lin, X. Yuan, J. Zhao, W. Yan, S. Zhou, L. Shi. The role of oxygen vacancies in water oxidation for perovskite cobalt oxide electrocatalysts: are more better? *Chem. Commun.* **2019**, *55*, 1442-1445.
- [10] Huang, Y.; Hu, J.; Li, J.; Xie, W.; Xu, H.-S.; Tang, K. Study on Water Splitting of the 214-Type Perovskite Oxides LnSrCoO<sub>4</sub> (Ln = La, Pr, Sm, Eu, and Ga). *Langmuir* **2024**, *40* (19), 9965-9974.
- [11] H. Wang, X. Chen, D. Huang, M. Zhou, D. Ding, H. Luo. Cation Deficiency Tuning of LaCoO<sub>3</sub> Perovskite as Bifunctional Oxygen Electrocatalyst. *ChemCatChem* **2020**, *12*, 2768.
- [12] X. Wang, Z. Pan, X. Chu, K. Huang, Y. Cong, R. Cao, R. Sarangi, L. Li, G. Li, S. Feng. Atomic-Scale Insights into Surface Lattice Oxygen Activation at the Spinel/Perovskite interface of Co<sub>3</sub>O<sub>4</sub>/La<sub>0.3</sub>Sr<sub>0.7</sub>CoO<sub>3</sub>. *Angew. Chem. Int. Ed.* **2019**, *58*, 11720.
- [13] Q. A. Islam, R. Majee, S. Bhattacharyya. Bimetallic nanoparticle decorated perovskite oxide for state-of-the-art trifunctional electrocatalysis. *J. Mater. Chem. A* **2019**, *7*, 19453–19464.

- [14] D. He, G. He, H. Jiang, Z. Chen, M. Huang. Enhanced durability and activity of the perovskite electrocatalyst  $\text{Pr}_{0.5}\text{Ba}_{0.5}\text{CoO}_{3-\delta}$  by Ca doping for the oxygen evolution reaction at room temperature. *Chem. Commun.* **2017**, 53, 5132.
- [15] Y. Tong, Y. Guo, P. Chen, H. Liu, M. Zhang, L. Zhang, W. Yan, W. Chu, C. Wu, Y. Xie. Spin-State Regulation of Perovskite Cobaltite to Realize Enhanced Oxygen Evolution Activity. *Chem* **2017**, 3, 812.
- [16] Guan, D., Zhou, J., Huang, Y.-C., Dong, C.-L., Wang, J.-Q., Zhou, W., Shao, Z. Screening highly active perovskites for hydrogen-evolving reaction via unifying ionic electronegativity descriptor. *Nat. Commun.* 2019, 10, 3755.
- [17] Togano, H., Asai, K., Oda, S., Ikeno, H. I., Kawaguchi, S., Oka, K., Wada, K., Yagi, S., Yamada, I. Highly active hydrogen evolution catalysis on oxygen-deficient double-perovskite oxide  $\text{PrBaCo}_2\text{O}_{6.8}$ . *Mater. Chem. Front.* **2020**, 4, 1519-1529.
- [18] Sun, Q., Dai, Z., Zhang, Z., Chen, Z., Lin, H., Gao, Y., Chen, D. Double perovskite  $\text{PrBaCo}_2\text{O}_{5.5}$ : An efficient and stable electrocatalyst for hydrogen evolution reaction. *J. Power Sources* **2019**, 427, 194-200.
- [19] Zhu, Y., Zhou, W., Zhong, Y., Bu, Y., Chen, X., Zhong, Q., Liu, M., Shao, Z. A Perovskite Nanorod as Bifunctional Electrocatalyst for Overall Water Splitting. *Adv. Energy Mater.* **2017**, 7, 1602122.
- [20] Wang, J., Gao, Y., Chen, D., Liu, J., Zhang, Z., Shao, Z., Ciucci, F. Water Splitting with an Enhanced Bifunctional Double Perovskite. *ACS Catal.* **2018**, 8, 364-371.
- [21] Islam, Q. A., Majee, R., Bhattacharyya, S. Bimetallic nanoparticle decorated perovskite oxide for state-of-the-art trifunctional electrocatalysis. *J. Mater. Chem. A* **2019**, 7, 19453-19464.
- [22] Ji, D., Liu, C., Yao, Y., Luo, L., Wang, W., Chen, Z. Cerium substitution in  $\text{LaCoO}_3$  perovskite oxide as bifunctional electrocatalysts for hydrogen and oxygen evolution reactions. *Nanoscale* **2021**, 13, 9952.
- [23] Zhang, Z., Chen, Y., Dai, Z., Tang, S., Chen, D. Promoting hydrogen-evolution activity and stability of perovskite oxides via effectively lattice doping of molybdenum. *Electrochim. Acta* **2019**, 312, 128-136.
- [24] Xu, X., Chen, Y., Zhou, W., Zhu, Z., Su, C., Liu, M., Shao, Z. A Perovskite Electrocatalyst for Efficient Hydrogen Evolution Reaction. *Adv. Mater.* **2016**, 28, 6442-6448.
- [25] Dai, J., Zhu, Y., Zhong, Y., Miao, J., Lin, B., Zhou, W., Shao, Z. Enabling High and Stable Electrocatalytic Activity of Iron-Based Perovskite Oxides for Water Splitting by Combined Bulk Doping and Morphology Designing. *Adv. Mater. Interfaces* **2019**, 6, 1801317.
- [26] Oh, N. K., Kim, C., Lee, J., Kwon, O., Choi, Y., Jung, G. Y., Lim, H. Y., Kwak, S. K., Kim, G., Park, H. In-situ local phase-transitioned  $\text{MoSe}_2$  in  $\text{La}_{0.5}\text{Sr}_{0.5}\text{CoO}_{3-\delta}$  heterostructure and stable overall water electrolysis over 1000 hours. *Nat. Commun.* **2019**, 10, 1723.
- [27] Wang, Y., Wang, Z., Jin, C., Li, C., Li, X., Li, Y., Yang, R., Liu, M. Enhanced overall water electrolysis on a bifunctional perovskite oxide through interfacial engineering. *Electrochim. Acta* **2019**, 318, 120-129.
